# Supplementary material
Source: MDPI journal article supplement (https://www.mdpi.com/2075-163X/11/3/254)
Supplement: s1 [file s1]

**Supplementary Table 2.** Calculated mass change values for selected variably altered and mineralized dacitic rocks from Nimbus after Grant [41-42]. Sample ALS-GK012 (felsic volcanic sandstone) from distal drillhole BODH01 was used as a least altered precursor. Icons were constructed using combinations of elements Al, Hf, La, Nb, Ta, Tb, Ti, Y, Yb and Zr. Mass gains/losses for trace elements are in ppm unless otherwise stated (in samples of massive pyrite/high-Ag polymetallic ore).

| Element                         | Weakly altered<br>(qtz-ser)<br>NBDH010/458m | Moderately altered<br>(qtz-ser-py)<br>NBDH010/551m | Intensely altered<br>(qtz-py>>fuch)<br>BOD202/395m | Massive pyrite<br>NBDH012/218m | High-Ag polymetallic<br>ore zone<br>NBDH024/164m |
|---------------------------------|---------------------------------------------|----------------------------------------------------|----------------------------------------------------|--------------------------------|--------------------------------------------------|
| SiO <sub>2</sub> (wt.%)         | +20.0                                       | +261.6                                             | +68.4                                              | +217.5                         |                                                  |
| Fe <sub>2</sub> O <sub>3t</sub> | -5.2                                        | +27.3                                              | +53.0                                              | +1556.0                        |                                                  |
| Al <sub>2</sub> O <sub>3</sub>  | +0.1                                        | 0.0                                                | 0.0                                                | 0.0                            |                                                  |
| MgO                             | -3.2                                        | -3.7                                               | -3.8                                               | -1.6                           |                                                  |
| CaO                             | -1.1                                        | -2.2                                               | -2.5                                               | -1.4                           |                                                  |
| K <sub>2</sub> O                | +0.4                                        | +7.6                                               | +1.8                                               | +4.6                           |                                                  |
| Na <sub>2</sub> O               | -1.1                                        | +2.6                                               | -0.9                                               | +1.5                           |                                                  |
| LOI                             | -1.3                                        | +19.7                                              | +29.5                                              | +1363.2                        |                                                  |
| S (wt.%)                        | -0.2                                        | +26.1                                              | +47.4                                              | +1792.6                        | +2599.8                                          |
| Ag (ppm)                        | -0.1                                        | +3.8                                               | +2.7                                               | +498.8                         | +20.8 wt.%                                       |
| As                              | +3.2                                        | +279.5                                             | +434.4                                             | +2.0 wt.%                      | +19.3 wt.%                                       |
| Ba                              | +120.7                                      | +594.6                                             | +293.4                                             | +0.1 w.%                       | +0.4 wt.%                                        |
| Bi                              | +0.4                                        | +0.2                                               | +9.0                                               | +4.7                           | +26.5                                            |
| Cd                              | -0.2                                        | -0.1                                               | +0.2                                               | +9.7                           | +9.8 wt.%                                        |
| Cr                              | -249.3                                      | -214.1                                             | +280.9                                             | +138.4                         | +0.1 wt.%                                        |
| Co                              | +11.7                                       | +90.1                                              | +163.9                                             | +1.3 wt.%                      | +0.3 wt.%                                        |
| Cu                              | +34.6                                       | +8.8                                               | +534.3                                             | +0.3 wt.%                      | +2.0 wt.%                                        |
| Cs                              | +0.8                                        | +7.3                                               | +4.2                                               | +27.5                          | +24.3                                            |
| Eu                              | -0.9                                        | +1.4                                               | -0.8                                               | +1.1                           | +5.3                                             |
| Rb                              | -2.7                                        | +186.1                                             | +28.9                                              | +112.1                         | -7.3                                             |
| Ni                              | -97.9                                       | -24.0                                              | +881.9                                             | +1.1 wt.%                      | +3.6 wt.%                                        |
| Pb                              | -7.5                                        | 113.3                                              | +169.19                                            | +0.7 wt.%                      | +1559.6 wt.%                                     |
| Sb                              | +1.9                                        | +53.5                                              | +61.8                                              | +0.9 wt.%                      | +24.5 wt.%                                       |
| Te                              | 0.0                                         | +0.2                                               | +0.1                                               | +10.3                          | +6.6                                             |
| Tl                              | +0.6                                        | +6.7                                               | +4.1                                               | +68.0                          | +0.1 wt.%                                        |
| Zn                              | -49.9                                       | -22.1                                              | +358.86                                            | +0.1 wt.%                      | +3547.2 wt.%                                     |
| Au (ppb)                        | -0.5                                        | +17.3                                              | +69.4                                              | +437.2                         | +11,065.7                                        |

**Supplementary Table 3.** Calculated mass change values for selected mafic rocks from Nimbus, after Grant [41-42], using sample ALS-GK019 (Brindabella basalt) from distal drillhole BODH015 as a least altered precursor. Elements La, Nb, Tb, Th, Y, Yb ( $\pm$  Zr and Hf) were used to construct sample isocons ( $R^2$  0.93 to 0.99).

| Element                         | Weak alteration<br>(qtz)<br>NBDH013/188m | Moderate alteration<br>(qtz-carb)<br>NBDH010/306m | Strong alteration<br>(qtz-carb>>py)<br>BOD202/358m |
|---------------------------------|------------------------------------------|---------------------------------------------------|----------------------------------------------------|
| SiO <sub>2</sub> (wt.%)         | +25.4                                    | +11.9                                             | +8.8                                               |
| Fe <sub>2</sub> O <sub>3t</sub> | -6.2                                     | -4.7                                              | -6.1                                               |
| Al <sub>2</sub> O <sub>3</sub>  | +7.8                                     | +7.2                                              | -2.2                                               |
| MgO                             | -1.8                                     | -1.8                                              | -0.1                                               |
| CaO                             | -4.0                                     | +2.6                                              | +4.2                                               |
| K <sub>2</sub> O                | -0.1                                     | 0.0                                               | -0.5                                               |
| Na <sub>2</sub> O               | +3.6                                     | +2.1                                              | +0.3                                               |
| LOI                             | -5.5                                     | +1.5                                              | +4.6                                               |
| S                               | -0.1                                     | +0.4                                              | +0.0                                               |
| Ag (ppm)                        | 0.0                                      | -0.2                                              | -0.2                                               |
| As                              | -101.5                                   | -83.0                                             | -101.4                                             |
| Ba                              | +267.3                                   | +12.6                                             | +18.1                                              |
| Bi                              | 0.0                                      | 0.0                                               | 0.0                                                |
| Cd                              | 0.0                                      | -0.2                                              | -0.2                                               |
| Cr                              | +247.1                                   | +136.1                                            | +347.5                                             |
| Co                              | -17.4                                    | +16.3                                             | -2.4                                               |
| Cu                              | +84.2                                    | +122.3                                            | +26.4                                              |
| Cs                              | +0.6                                     | +1.1                                              | +0.5                                               |
| Eu                              | 0.0                                      | +0.1                                              | -0.4                                               |
| Rb                              | +0.9                                     | +2.1                                              | -9.3                                               |
| Ni                              | +143.1                                   | +124.8                                            | +120.8                                             |
| Pb                              | +1.5                                     | +1.8                                              | -1.3                                               |
| Sb                              | -1.4                                     | -1.5                                              | -1.1                                               |
| Te                              | 0.0                                      | 0.0                                               | 0.0                                                |
| Tl                              | 0.0                                      | +0.3                                              | +0.1                                               |
| Zn                              | -20.3                                    | -20.0                                             | -39.8                                              |
| Au (ppb)                        | 0.5                                      | -2.8                                              | -1.9                                               |
